# Supplementary material
Source: PubMed Central journal article supplement (PMC3893079)
Supplement: NIHMS544450-supplement-1_si_001.pdf [file NIHMS544450-supplement-1_si_001.pdf]

# Allele-Selective Inhibition of Huntingtin and Ataxin-3 Expression by RNA Duplexes Containing Unlocked Nucleic Acid Substitutions

*Yuichiro Aiba<sup>†</sup>, Jiaxin Hu<sup>†</sup>, Jing Liu<sup>†</sup>, Qin Xiang<sup>‡</sup>, Carlos Martinez<sup>‡</sup>, and David R. Corey<sup>†\*</sup>*

<sup>†</sup>Departments of Pharmacology and Biochemistry, UT Southwestern Medical Center, 6001 Forest Park Road, Dallas, TX 75390-9041, USA. <sup>‡</sup>Sigma Custom Products, 9186 Six Pines Drive, The Woodlands, TX 77379, USA

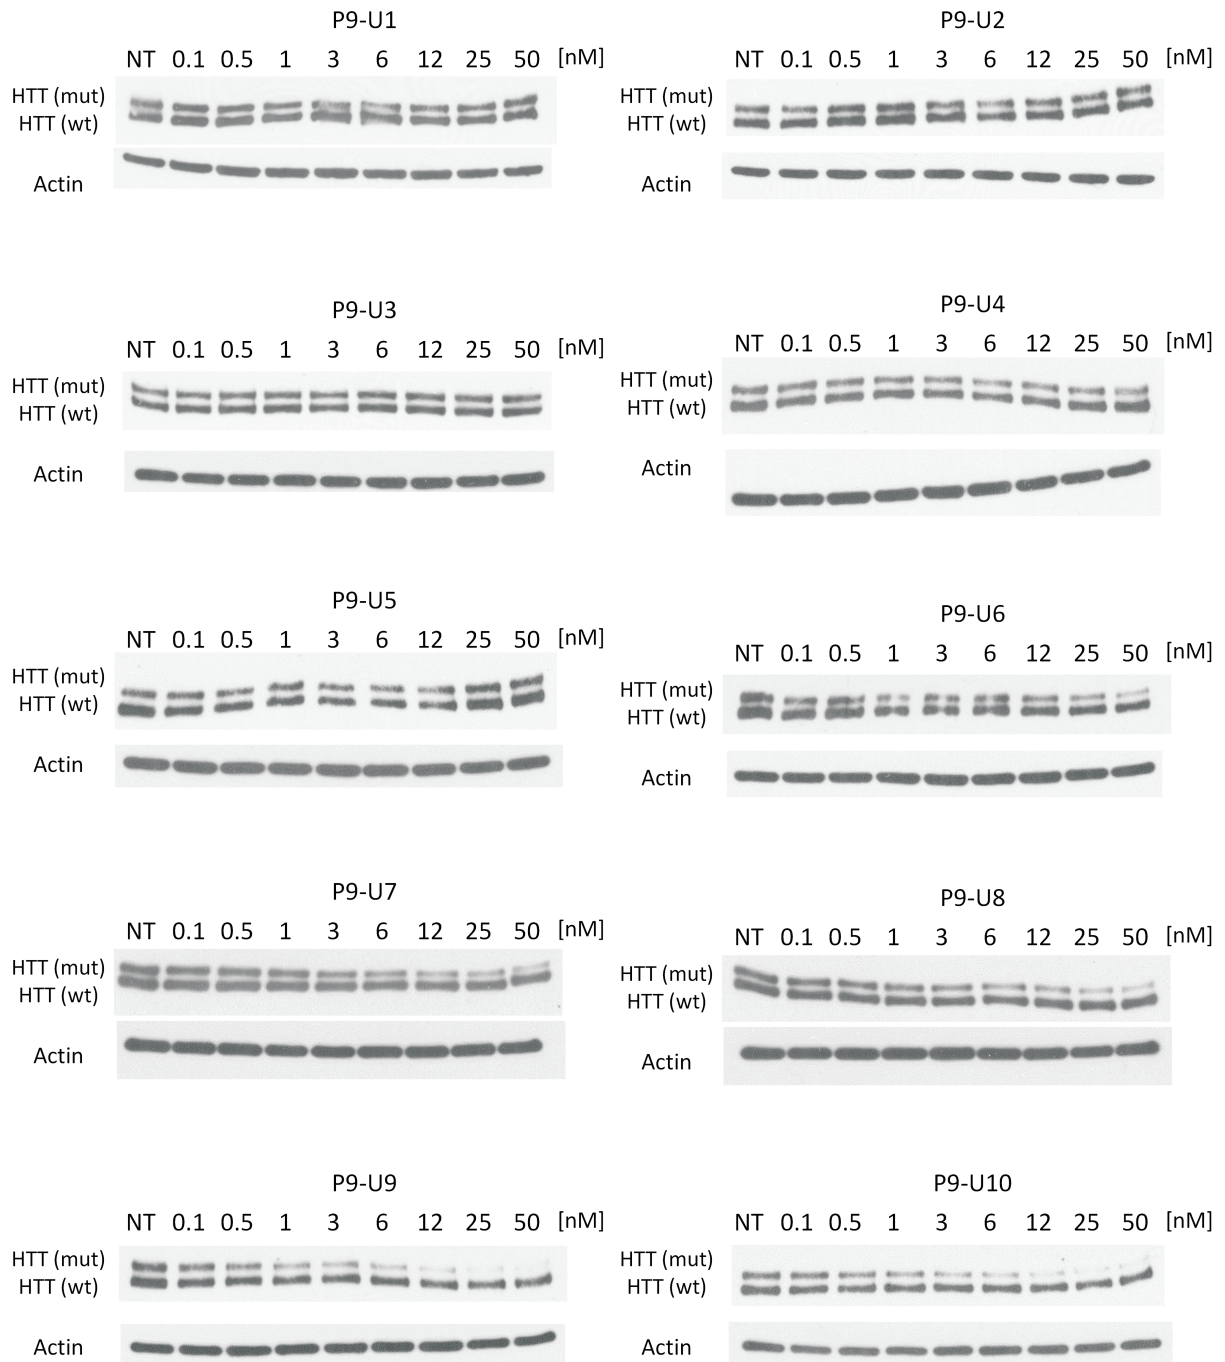

**Figure S1.** Representative gel images of the dose response curves for inhibition of HTT expression by UNA-modified P9 duplexes (P9-U1 – P9-U10). NT: no treatment/no duplex added.

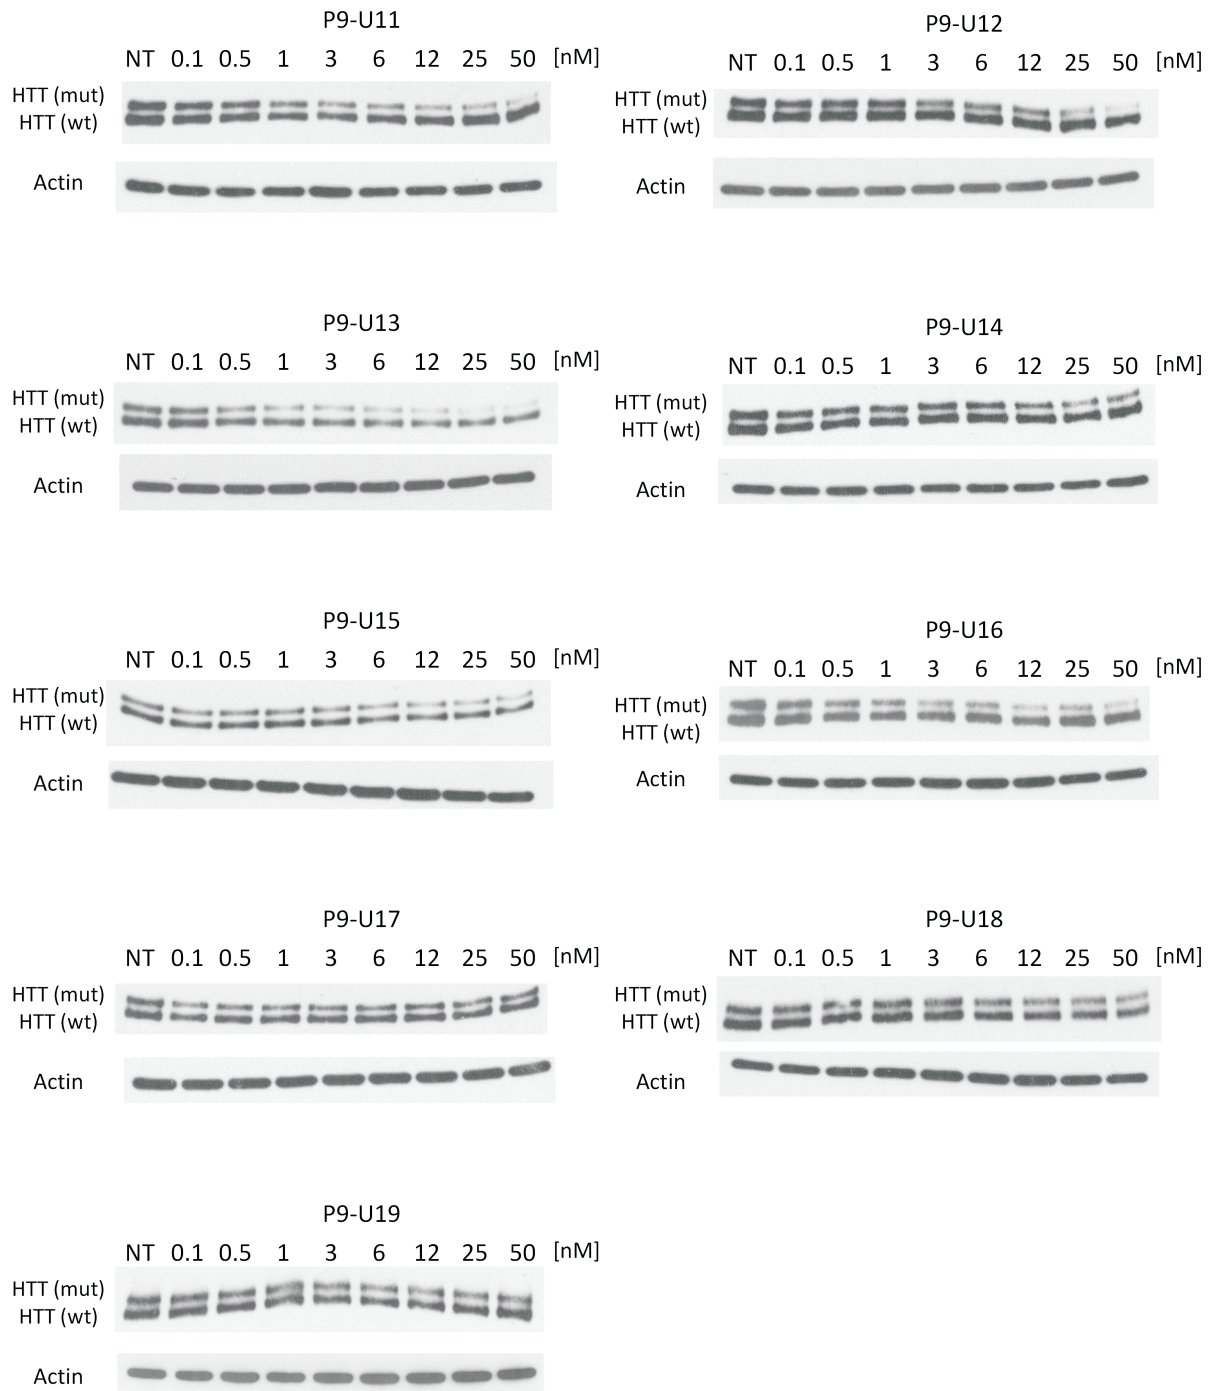

**Figure S2.** Representative gel images of the dose response curves for inhibition of HTT expression by UNA-modified P9 duplexes (P9-U11 – P9-U19). NT: no treatment/no duplex added.
